# Supplementary material for: Biorenewable vegetable oil based nonisocyanate polyurethanes and nanocomposites; formulation, characterisation, biodegradation, anticorrosion and antifouling coatings
Source: Royal Society of Chemistry journal article supplement (doi:10.1039/d3nj05862j), 2024-01-01
Supplement: d3nj05862j1.pdf [file d3nj05862j1.pdf]

1 **Biorenewable Vegetable Oil Derived Nonisocyanate Polyurethanes and Nanocomposites;**  
2 **Formulation, Characterisation, Biodegradation, Anticorrosion and Antifouling Coatings**

3 *Yasmin R. Sulthana<sup>1</sup>, Dinesh K. Chelike<sup>2</sup> and Senthil A. Gurusamy Thangavelu,<sup>2\*</sup>*

4 <sup>1</sup>Department of Physics and Nanotechnology, <sup>2</sup>Department of Chemistry, SRM Institute of  
5 Science and Technology, Kattankulathur 603203, Chennai, Tamil Nadu, India.

6 email: [senthilt1@srmist.edu.in](mailto:senthilt1@srmist.edu.in)

| 7 <b>Content</b>                                                                                                                                       | <b>Page</b> |
|--------------------------------------------------------------------------------------------------------------------------------------------------------|-------------|
| 8 Materials                                                                                                                                            | S3          |
| 9 Methods                                                                                                                                              | S3          |
| 10 Statistical analysis                                                                                                                                | S4          |
| 11 Experimental                                                                                                                                        | S4          |
| 12 Synthesis of acid group functionalized castor oil [CO-(COOH)]                                                                                       | S4          |
| 13 Synthesis of castor oil cyclic carbonate (CO-CC)                                                                                                    | S5          |
| 14 Formulation of nonisocyanate polyurethanes (NIPU)                                                                                                   | S6          |
| 15 Formulation of nonisocyanate polyurethanes nanocomposites (NIPU-F)                                                                                  | S7          |
| 16 Synthesis of iron oxide (Fe <sub>3</sub> O <sub>4</sub> ) nanoparticles                                                                             | S7          |
| 17 Synthesis of silica coated on iron oxide nanoparticles (Fe <sub>3</sub> O <sub>4</sub> @SiO <sub>2</sub> )                                          | S8          |
| 18 Synthesis of amine functionalized silica coated iron oxide<br>19 nanoparticles (Fe <sub>3</sub> O <sub>4</sub> @SiO <sub>2</sub> -NH <sub>2</sub> ) | S8          |
| 20 Coatings                                                                                                                                            | S8          |
| 21 Method of biodegradation studies                                                                                                                    | S9          |
| 22 Studies on corrosion resistance                                                                                                                     | S9          |
| 23 Evaluation of antibacterial properties                                                                                                              | S10         |

|    |                                                                                                                                       |     |
|----|---------------------------------------------------------------------------------------------------------------------------------------|-----|
| 24 | Evaluation of antifouling properties                                                                                                  | S10 |
| 25 | Fig. S1 Structural diagram of castor oil                                                                                              | S11 |
| 26 | Fig. S2 <sup>1</sup> H NMR spectrum of commercial castor oil (CO)                                                                     | S11 |
| 27 | Fig. S3 <sup>1</sup> H NMR spectrum of acid groups functionalised castor oil (CO-COOH)                                                | S12 |
| 28 | Fig. S4 <sup>13</sup> C NMR spectrum of acid groups functionalised castor oil (CO-COOH)                                               | S12 |
| 29 | Fig. S5 <sup>13</sup> C NMR spectrum of castor oil cyclic carbonate (CO-CC)                                                           | S13 |
| 30 | Fig.S6 DSC profile for cyclic carbonate                                                                                               | S13 |
| 31 | Fig.S7 Elemental mapping images of synthesised i) Fe <sub>3</sub> O <sub>4</sub> ii) Fe <sub>3</sub> O <sub>4</sub> @SiO <sub>2</sub> |     |
| 32 | iii)Fe <sub>3</sub> O <sub>4</sub> @SiO <sub>2</sub> -NH <sub>2</sub>                                                                 | S14 |
| 33 | Fig.S8 Physical images of coatings on mild carbon steel before and                                                                    |     |
| 34 | after immersion in electrolyte solution.                                                                                              | S14 |
| 35 | Fig.S9 Photograph images of NIPU and NIPU-F films                                                                                     | S15 |
| 36 | Fig.S10 Chemical mechanism for the formulation of NIPU and NIPU-F                                                                     | S15 |
| 37 | Fig.S11 FT IR data of biodegradation studies in PBS saline medium                                                                     |     |
| 38 | a) NIPU and b) NIPU-F.                                                                                                                | S16 |
| 39 | Fig.S12 Bode diagrams for blank, NIPU and NIPU-F after                                                                                |     |
| 40 | immersed in electrolyte for 24h.                                                                                                      | S16 |
| 41 | Fig.S13 Zone of inhibition test for qualitative analysis of antibacterial                                                             |     |
| 42 | efficacy in NIPU, NIPU-F and blank substrate.                                                                                         | S17 |
| 43 | Table S1. S1 Equivalent circuit-based impedance data for coatings                                                                     |     |
| 44 | immersed in 3.5wt% NaCl for 1h and 24 h                                                                                               | S17 |
| 45 | Table S2. Statistical analysis data for the sample NIPU and NIPU-F                                                                    |     |
| 46 | undergoes degradation for 45 days in PBS saline medium                                                                                | S18 |

47 Table S3. Statistical analysis data for antibacterial and anti-algae studies S18

48 References S19

49

## 50 **Materials**

51 Glycerol 1,2-carbonate (GC), 1,12-diaminododecane (DDA) were procured from Carbanio  
52 chemicals, Hyderabad, India. Succinic anhydride (SA), triethylamine (Et<sub>3</sub>N), 4-  
53 dimethylaminopyridine (DMAP), N, N'-dicyclohexylcarbodiimide (DCC), ferric trichloride  
54 hexahydrate (FeCl<sub>3</sub>.6H<sub>2</sub>O), aqueous ammonia (25% solution), sodium acetate (CH<sub>3</sub>COONa),  
55 ethylene glycol, tetraethyl orthosilicate (TEOS), (3-aminopropyl) trimethoxysilane (APTMS),  
56 acetonitrile (CH<sub>3</sub>CN), methanol, dichloromethane (DCM), chloroform, 1,4-dioxane and toluene  
57 were supplied by Siscon Research Laboratories Pvt. Ltd., Chennai, India. All the organic solvents  
58 were dried and distilled prior to use. Castor oil (CO, ~ mol. wt. 927 g/mol.) was purchased from  
59 the domestic commercial store and heated in oil bath at 100°C under reduced pressure to eliminate  
60 the trace quantity of moisture. The mild carbon steel for coating studies were purchased from  
61 hardware suppliers.

## 62 **Methods**

63 <sup>1</sup>H and <sup>13</sup>C NMR data was acquired from Bruker Avance III NMR instrument operating  
64 at 500 MHz by dissolving in deuterated solvents, CDCl<sub>3</sub> or DMSO-d<sub>6</sub> with the internal standard,  
65 tetramethylsilane. Mestrenova software was used to process the NMR data as well as to find the  
66 chemical shift values. FT IR data was collected from IR Tracer 100 Shimadzu instrument by ATR-  
67 FTIR mode. The morphology of film sample and respective elemental mapping was recorded using  
68 Thermoscientific Apreo S Scanning electron microscopy (SEM). Thermogravimetric analysis  
69 (TGA) was performed in the instrument of Netzsch-STA 2500 Regulus, while the sample of 5mg  
70 placed on platinum pan and heated from ambient temperature to 600°C at the heating rate of

71 10°C/min. Differential Scanning calorimetry (DSC) analyses were carried out by the instrument  
72 Netzsch-DSC 214 Polyma, between ambient temperature to 500°C at the heating rate of 10°C/min.  
73 powder XRD analysis was conducted in Bruker Xray Diffractometer USA D8 Advance, Davinci  
74 with aid of Copper-ray tube (CuK $\alpha$ ), wavelength ( $\lambda=1.5148\text{\AA}$ ) by the scanning range of  $2\theta$   
75 diffraction from 10 to 80°. Water contact angle for the hydrophilicity samples was measured at  
76 ambient condition by use of 2 $\mu$ L volume of Milli Q water through sessile drop method from DMS-  
77 401, Japan. The magnetism data of pristine and functionalized nanomaterials was measured by  
78 Agilent technologies LakeShore Vibrating Sample Magnetometer (VSM) of model number 7407  
79 at ambient temperature. Optical microscope images were collected from GOKO MIAMB, India.

#### 80 **Statistical analysis**

81 The statistical information was analysed utilizing Origin pro 8.5 software. These results are  
82 expressed in the form of means  $\pm$  standard deviation. The error bars tend to be represented by  
83 means for standard deviation for  $n=3$  and the statistical significance (minor error)  $p \leq (0.05)$ .<sup>11</sup>

#### 84 **Experimental**

##### 85 **Synthesis of acid groups functionalised castor oil [CO-(COOH)]**

86 This synthesis was performed upon modification of previously reported procedure.<sup>5</sup> In a  
87 clean and dry Schlenk tube, castor oil (5 g, 0.0054 mol) was weighed after the elimination of  
88 moisture and dissolved in 1,4-dioxane (20 mL) and allowed to stirred for 5 min. at ambient  
89 condition. To the above solution, triethylamine (1.619 g, 0.016 mol) was added and stirred for 2 h  
90 at ambient temperature under N<sub>2</sub> atm. In another RB flask (100 mL), succinic anhydride (1.601 g,  
91 0.016 mol) and 4-dimethylaminopyridine (1.95 g, 0.016 mol) were taken and stirred for 2 h after  
92 added 1,4-dioxane (20 mL) under N<sub>2</sub> atm. The solution of succinic anhydride and 4-

93 dimethylaminopyridine in 1,4-dioxane was added over 30 min. into the Schlenk tube containing  
94 the reaction mixture and continued to stir for 24 h under N<sub>2</sub> atm.

95 The reaction mixture was filtered and the filtrate was washed three times using dil. HCl (2N,  
96 15 mL) to eliminate the excess 4-dimethylaminopyridine and triethylamine. The reaction product  
97 was concentrated under vacuum and recrystallized using methanol to obtain pale yellow colour  
98 semisolid. Yield: 3.1 g (48 %)

99 <sup>1</sup>H NMR [CDCl<sub>3</sub>, 500 MHz, δ (ppm)]: 0.86 (-CH<sub>3</sub>), 1.29 (-CH<sub>2</sub>), 1.5-1.6 (-CH=CH-CH<sub>2</sub>-CH (OH)-  
100 CH<sub>2</sub>), 2.2 (CH=CH-CH<sub>2</sub>-CH (OH)-CH<sub>2</sub>), 2.61(CH-(OCO)-CH<sub>2</sub>CH<sub>2</sub>COOH), 2.7 (CH-(OCO)-  
101 CH<sub>2</sub>-COOH), 4.13-4.2 (CH-(OCO)-CH<sub>2</sub>CH<sub>2</sub> -COOH), 4.87 (-OH), 5.3-5.4 (-CH=CH-). 0.86(-  
102 CH<sub>3</sub>, H<sub>12</sub>), 1.29(-CH<sub>2</sub>, H<sub>9</sub>, H<sub>13</sub>), 1.51-1.6(-CH<sub>2</sub>, H<sub>8</sub>, H<sub>13</sub>), 2.29 (-CH<sub>2</sub>), 2.61(-CH<sub>2</sub>), 3.6 (-CH, H<sub>2</sub>),  
103 4.1-4.2 (-CH<sub>2</sub>, H<sub>5</sub>), 4.8 (-CH, H<sub>6</sub>), 5.2-5.5 (CH-O, CH=CH, H<sub>12</sub>, H<sub>3</sub>, H<sub>4</sub>)

104 <sup>13</sup>C NMR [CDCl<sub>3</sub>, 100.6 MHz, δ(ppm)] CO-COOH 14 (C<sub>1</sub>), 20-35 (C<sub>13,7,8</sub>, b, c), 26-35 (C<sub>3,7,9,10,11</sub>),  
105 61 (C<sub>5</sub>), 67 (C<sub>1</sub>), 75 (C<sub>2</sub>), 124 (C<sub>3</sub>), 133 (C<sub>4</sub>), 75 (C<sub>6</sub>), 124 (C<sub>3</sub>), 133(C<sub>4</sub>).<sup>6</sup>

#### 106 **Synthesis of castor oil cyclic carbonate (CO-CC)**

107 This synthesis was performed upon modification of previously reported procedure.<sup>5</sup> In a  
108 clean and dry RB flask (100 mL), acid groups functionalised castor oil [CO-(COOH), 3g, 0.0025  
109 mol] and N,N'-dicyclohexylcarbodiimide (DCC, 1.522g, 0.00738 mol) were charged and  
110 dissolved in DCM (20 mL) and the reaction mixture was stirred at ambient temperature for 1h  
111 under N<sub>2</sub> atm. In another RB flask, glycerol 1,2-carbonate (GC, 0.871g, 0.00738 mol) and 4-  
112 dimethylaminopyridine (DMAP, 0.901g, 0.00738 mol) were added into DCM (10 mL) and stirred  
113 at ambient temperature under nitrogen atmosphere for 1h. The solution of glycerol 1,2-carbonate  
114 and 4-dimethylaminopyridine in DCM was added slowly into the RB flask containing CO-  
115 (COOH) and DCC in DCM. The reaction mixture was continued to stir at ambient temperature for

116 24h under N<sub>2</sub> atm. After the completion of the reaction, the reaction mixture was filtered and the  
117 filtrate concentrated in rotavapor and the viscous product was recrystallized using methanol and  
118 kept in the refrigerator to obtain yellow semi solid product. Yield: 2.4 g (63%)

119 <sup>1</sup>H NMR (CDCl<sub>3</sub>, 500 MHz): 0.86 (-CH<sub>3</sub>, H<sub>12</sub>), 1.30(-CH<sub>2</sub>, H<sub>9</sub>, H<sub>13</sub>), 1.53-1.60 (-CH<sub>2</sub>, H<sub>8</sub>, H<sub>13</sub>),  
120 2.31(-CH<sub>2</sub>), 2.61 (-CH<sub>2</sub>), 3.68 (-CH, H<sub>2</sub>), 4.1-4.2 (-CH<sub>2</sub>, H<sub>5</sub>, e), 4.4-4.5 (-CH<sub>2</sub>, d), 4.7(-CH, f), 4.8  
121 (-CH, H<sub>6</sub>), 5.2-5.5 (CH-O, CH=CH, H<sub>12</sub>, H<sub>3</sub>, H<sub>4</sub>).

122 <sup>13</sup>C NMR (δ, 100.6 MHz, ppm) of CO-CC as represented in Fig. S3 14 (C<sub>1</sub>), 20-35 (C<sub>5,7,8, b, c</sub>),  
123 51 (C<sub>e</sub>), 55(C<sub>d</sub>), 69(C<sub>f</sub>), 75 (C<sub>6</sub>), 124(C<sub>3</sub>), 133 (C<sub>4</sub>), 154 (C<sub>h</sub>), 173-174 (C<sub>a, g</sub>)<sup>7,8</sup>

#### 124 **Formulation of nonisocyanate polyurethanes (NIPU)**

125 The synthesis of NIPU was executed upon loading all components in a high pressure tube.  
126 Herein, the ratio (1:1.5) was chosen among the castor oil cyclic carbonate (CO-CC) and 1,12-  
127 diaminododecane (DDA). Castor oil cyclic carbonate (CO-CC, 3g, 0.001955 mol) and acetonitrile  
128 (3 mL) were charged in high pressure tube and stirred at ambient condition for 15 min.  
129 Subsequently, 1,12-diaminododecane (DDA, 0.587g, 0.00293 mol) was added to the pressure tube  
130 and continued to stir for 30 min prior to the addition of dry triethylamine (TEA, 0.36 mL) as a  
131 catalyst. The pressure tube was closed firmly and stirred for 8 h while heated in hot oil bath at  
132 110°C. The yellow colour was intensified at the end of reaction and the resulting viscous product  
133 was poured on surface of glass plates and allowed for curing at ambient temperature for 3 days.  
134 Further curing was carried out in vacuum oven at 70°C for 32 h to recover as NIPU film.

#### 135 **Formulation of nonisocyanate polyurethanes nanocomposites (NIPU-F)**

136 The same procedure for NIPU was adopted for the synthesis of NIPU-F for the covalent  
137 incorporation of amine functionalized silica coated on iron oxide nanoparticles (0.5wt.%). Castor  
138 oil cyclic carbonate (CO-CC, 3g, 0.001955 mol) and acetonitrile (3 mL) were charged in high

139 pressure tube and stirred at ambient condition for 15 min. Subsequently, 1,12-diaminododecane  
140 (DDA, 0.587g, 0.00293 mol) and amine functionalised silica coated iron oxide nanoparticles  
141 ( $\text{Fe}_3\text{O}_4@\text{SiO}_2\text{-NH}_2$ , 18 mg, 0.5 wt.%) were added to the pressure tube and continued to stir for 30  
142 min prior to the addition of dry triethylamine (TEA, 0.36 mL) as a catalyst. The pressure tube was  
143 closed firmly and stirred for 8 h while heated in hot oil bath at 110°C. The mild brown colour was  
144 intensified at the end of reaction and the resulting viscous product was poured on the surface of  
145 glass plates and allowed for curing at ambient temperature for 3 days. Further curing was carried  
146 out in a vacuum oven at 70°C for 32 h to recover as NIPU-F film.

#### 147 **Synthesis of magnetic iron oxide ( $\text{Fe}_3\text{O}_4$ ) nanoparticles**

148  $\text{Fe}_3\text{O}_4$  nanoparticles was synthesised via hydrothermal method by modification of  
149 previously reported procedure.<sup>9</sup> In a clean RB flask,  $\text{FeCl}_3\cdot 6\text{H}_2\text{O}$  (1.352 g, 0.005 mol) was  
150 dissolved in ethylene glycol (40 mL) and allowed to stir at ambient condition for 10 min. To the  
151 above solution, sodium acetate ( $\text{CH}_3\text{COONa}$ , 0.596 g, 0.00438 mol) was added and continued to  
152 stir at ambient condition for 1 h prior to transferring the reaction mixture into Teflon coated  
153 autoclave (100 mL) and placed inside a muffle furnace maintained at 200°C for the duration of 10  
154 h. After this hydrothermal treatment, the autoclave was allowed to attain the ambient temperature  
155 and the resulting product was further washed repeatedly with distilled water and ethanol. Finally,  
156 the magnetic spherical nanoparticles dried under high vacuum at ambient temperature.

#### 157 **Synthesis of silica coated magnetic iron oxide nanoparticles ( $\text{Fe}_3\text{O}_4@\text{SiO}_2$ )**

158 To execute the silica coating on the spherical surface of iron oxide nanoparticles, adopted  
159 the Stobber's method by modification of previous report.<sup>10</sup> The above synthesised iron oxide  
160 nanoparticles (0.4 g) was added into a mixture (10:1) of ethanol (40mL) and deionized water (4  
161 mL) and the uniform dispersion was achieved by subjecting to ultrasonication for 20 min.

162 Subsequently, tetraethyl orthosilicate (TEOS, 0.8 mL) was added and aqueous ammonia (1.2 mL,  
163 25% solution) added slowly under nitrogen atmosphere. The above reaction mixture was refluxed  
164 at 60°C and stirred vigorously under inert condition for the period of 12 h. After cooling down to  
165 ambient temperature, the brown precipitate was separated with the aid of a magnet and washed  
166 with ethanol and the nanoparticles dried under high vacuum at ambient temperature.

#### 167 **Synthesis of amine functionalized silica coated iron oxide nanoparticles. ( $\text{Fe}_3\text{O}_4@\text{SiO}_2\text{-NH}_2$ )**

168 To functionalise the amine groups on the surface of silica coated magnetic iron oxide  
169 nanoparticles ( $\text{Fe}_3\text{O}_4@\text{SiO}_2$ ), the reaction performed by modification of previously reported  
170 procedure.<sup>10</sup> Silica coated magnetic iron oxide nanoparticles ( $\text{Fe}_3\text{O}_4@\text{SiO}_2$ , 0.8 g) was dispersed  
171 in toluene (20 mL) under nitrogen atmosphere. To the above suspension, 3-aminopropyl  
172 trimethoxysilane (APTMS, 0.96 mL) was added and the suspension was subjected to  
173 ultrasonication. Further, the resulting mixture was refluxed in a hot oil bath at 120°C for 10 h.  
174 After the reaction, the product,  $\text{Fe}_3\text{O}_4@\text{SiO}_2\text{-NH}_2$  was isolated with the aid of magnet and washed  
175 thrice using anhydrous ethanol, the product was dried high under vacuum at ambient condition.

#### 176 **Coatings**

177 In the context of coating application, mild carbon steel serves as a foundational panel or  
178 substrate for evaluating the efficacy of corrosion resistance, antibacterial properties, whereas glass  
179 slide was used for assessing antifouling studies. To execute the steel panel for coating, a series of  
180 pre-preparatory steps were adopted in these studies. These steps include the use of abrasive  
181 materials for cleaning the surface followed by thorough rinsing by distilled water followed by  
182 acetone. In each coating, the thickness of NIPU as well as NIPU-F coatings was approximately  
183 100  $\mu\text{m}$ .

#### 184 **Method of biodegradation studies**



185 The degradation study was conducted in a phosphate buffer saline solution of pH value 7.4.  
186 The dry form of film samples occurred to cut into dimensions ( $\sim 10 \times 10$  mm) with initial weight  
187 of 100 mg. These samples were soaked in glass vials containing PBS (15ml) and then incubated  
188 at 37°C. In a periodic interval of every 5 days the samples were removed from the buffer solution,  
189 rinsed using distilled water and subsequently dried in a vacuum oven before measuring its reduced  
190 weight to determine the percentage of weight loss. The degradation medium, PBS was refreshed  
191 at every 5 days and the weight loss percentage, indicative of hydrolytic degradation was  
192 determined by the following equation.<sup>1</sup>

193 Remaining mass % =  $W_2/W_1 * 100$

194 where,  $W_1$  and  $W_2$  denote the initial mass and final mass of sample before and after degradation  
195 study.

#### 196 **Studies on corrosion resistance**

197 Electrochemical impedance spectroscopy (EIS) was employed to assess the corrosion  
198 resistance of the coated panels. These evaluations were conducted using a biologic VST 300  
199 instrument equipped with EC lab software. All electrochemical measurements were performed at  
200 room temperature using a 3.5% sodium chloride (NaCl) solution. The experimental setup consisted  
201 of a three-electrode cell configuration, comprising a calomel electrode, a platinum electrode and a  
202 coated panel functioning as the reference electrode, counter electrode and working electrode  
203 respectively. The exposed surface area of the coated panels in contact with the NaCl solution was  
204 consistent at  $1\text{cm}^2$  for all test cases.<sup>2</sup>

205

206

#### 207 **Evaluation of antibacterial properties**

208 *Escherichia coli* (*E. coli*) was chosen as the model bacterium to assess the antibacterial properties  
209 of the coatings using the shaking flask technique. The experimental procedure for this method was  
210 as follows: coating samples were immersed in a sterile 0.9wt% saline solution (40ml). the mixture  
211 was then agitated at a temperature of 37 for a duration of 4h. Afterward, a 0.1ml portion was  
212 extracted from the test tube and subjected to a ten-fold dilution. The resulting diluted solution was  
213 subsequently plated onto nutrient -agar plates in triplicate and incubated at 37°C for 72 hours. The  
214 count of bacterial colonies on each plate was documented.

215 To calculate the rate of bacterial elimination (R) concerning viable bacteria, the following formula  
216 was employed= $(N_c - N_s) / N_c$ ,

217 Where,  $N_c$  represents the number of microbial colonies observed in the control tube (absent any  
218 coating), and  $N_s$  corresponds to the number of microbial colonies observed in the tube containing  
219 the coatings.<sup>3</sup>

## 220 **Evaluation of antifouling properties**

221 *Spirulina platensis* (*S. platensis*) was selected as the marine algae for the studies of anti-fouling  
222 characteristics of coatings.<sup>4</sup> The culture was placed in a light incubator at a temperature of 30°C  
223 for a duration of 7 days. To prepare for the algae biofouling test, 20ml suspension of *S. platensis*  
224 in the log-phase was diluted tenfold using the same medium and incubated. After 7 days at 30°C,  
225 each sample was gently rinsed with deionized water to remove non-adherent cells from the surface.  
226 The attachment of cells and growth of the biofilm were evaluated using a fluorescence microscope  
227 (Neubauer's improved chamber type). The algae biofouling was quantified as the coverage of the  
228 biofilm by cells. The number of algae cells/ml was calculated using the formula given below,

229 Algae cells per smallest square =  $X/Y$  \* specific factor

230 Where, X = Total sum of counted cells Y = Total smallest squares Specific factor = 4

231

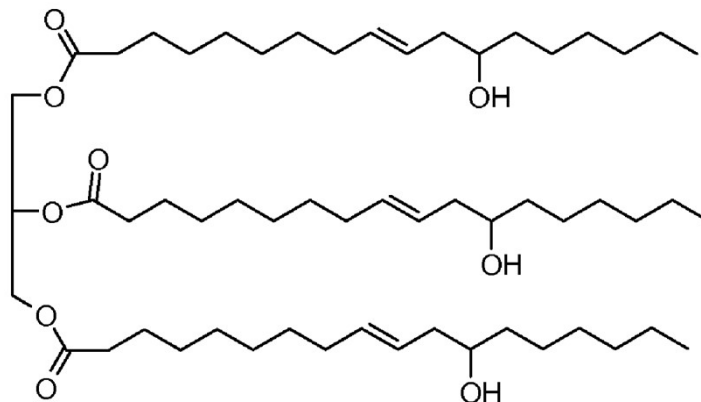

232

233

Fig.S1 Structure of castor oil (CO).

234

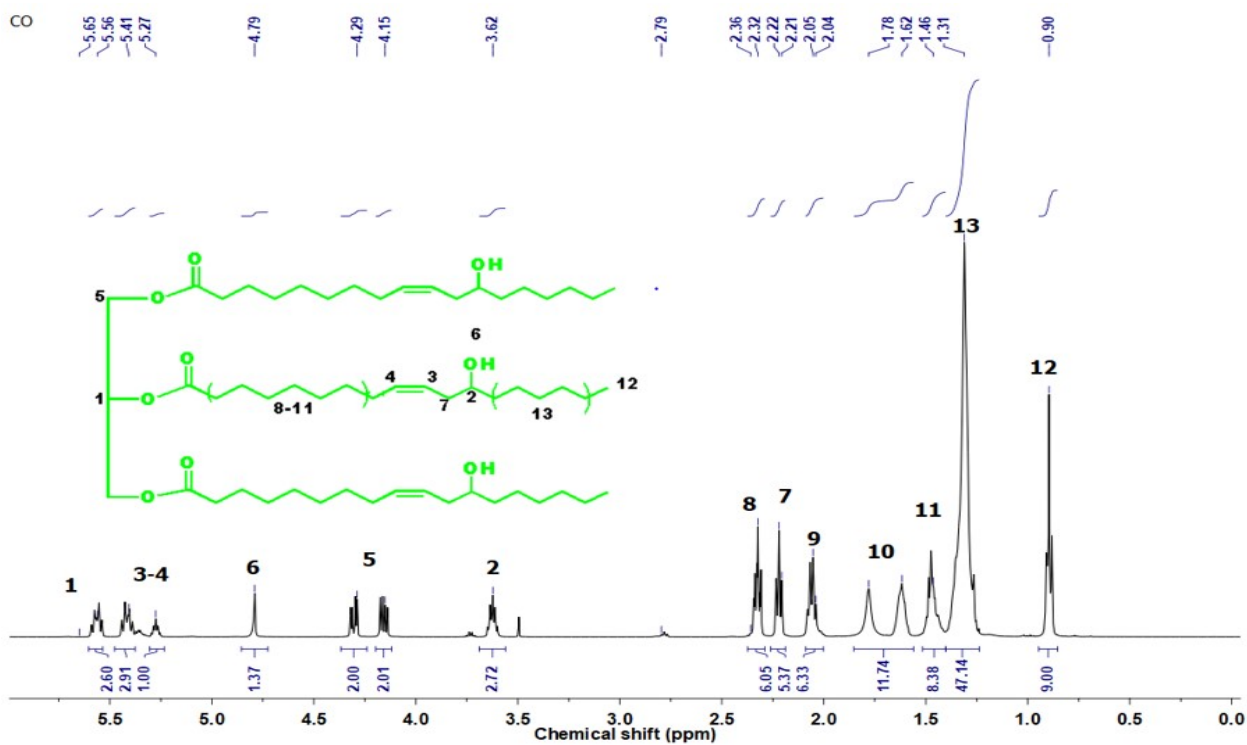

235

236

Fig. S2  $^1\text{H}$  NMR spectrum of commercial castor oil (CO).

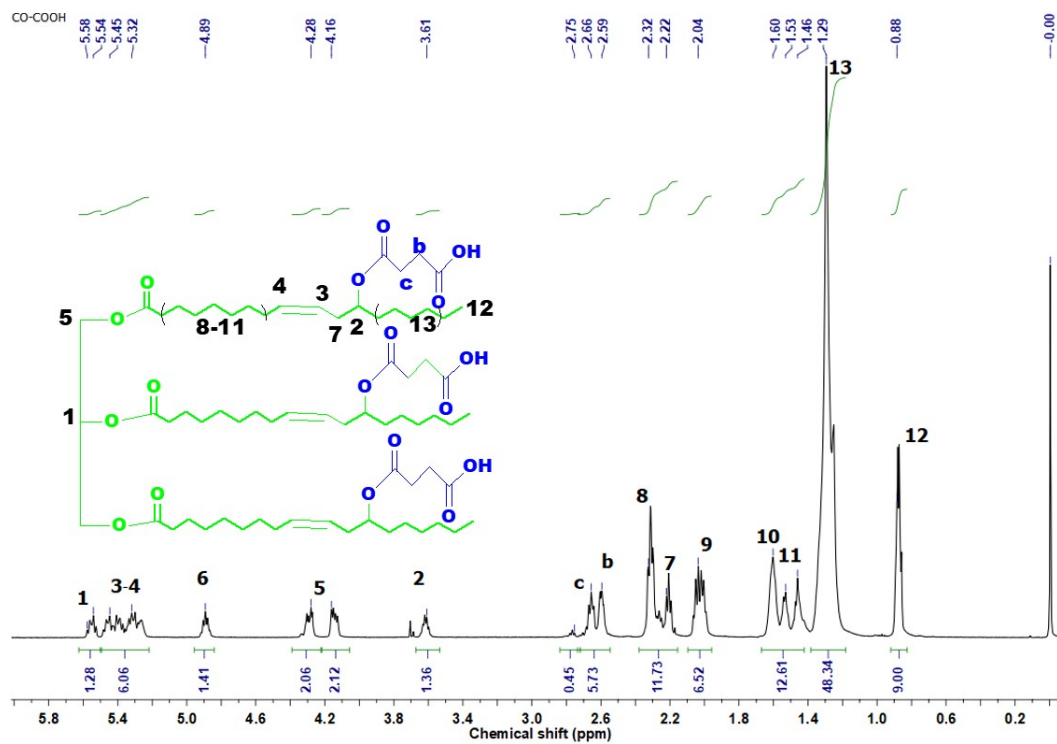

237

238

Fig. S3  $^1\text{H}$  NMR spectrum of acid groups functionalised castor oil (CO-COOH).

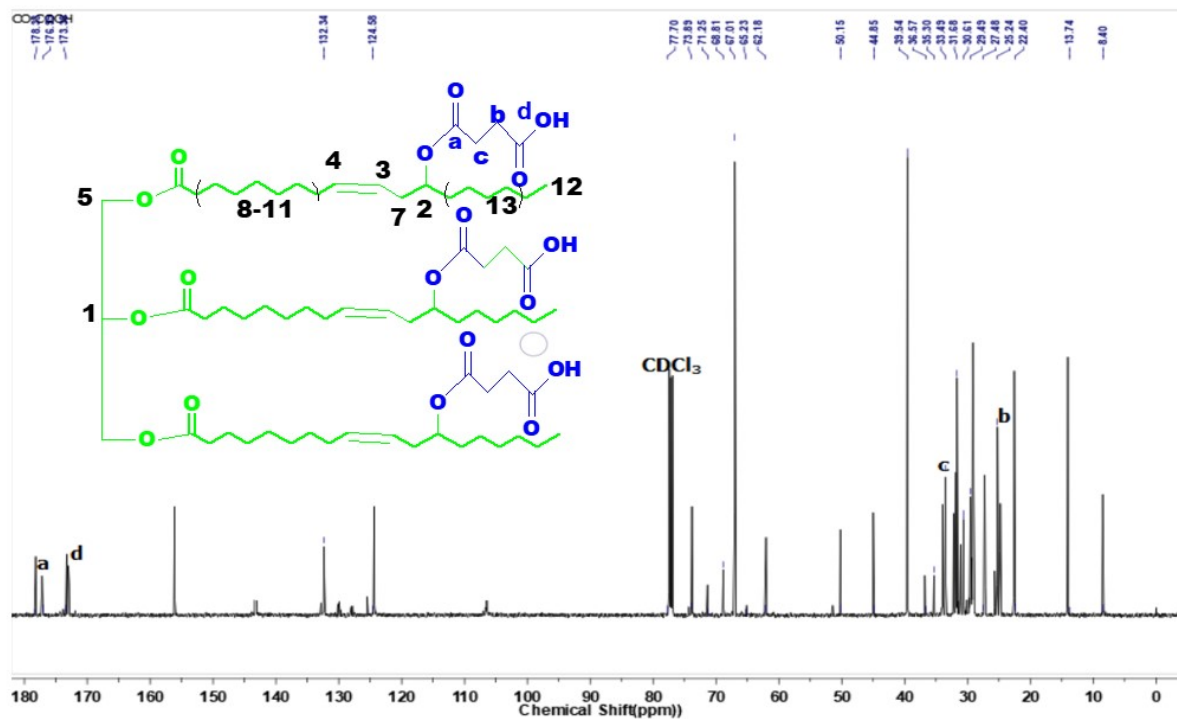

239

240

Fig. S4  $^{13}\text{C}$  NMR spectrum of acid groups functionalized castor oil (CO-COOH).

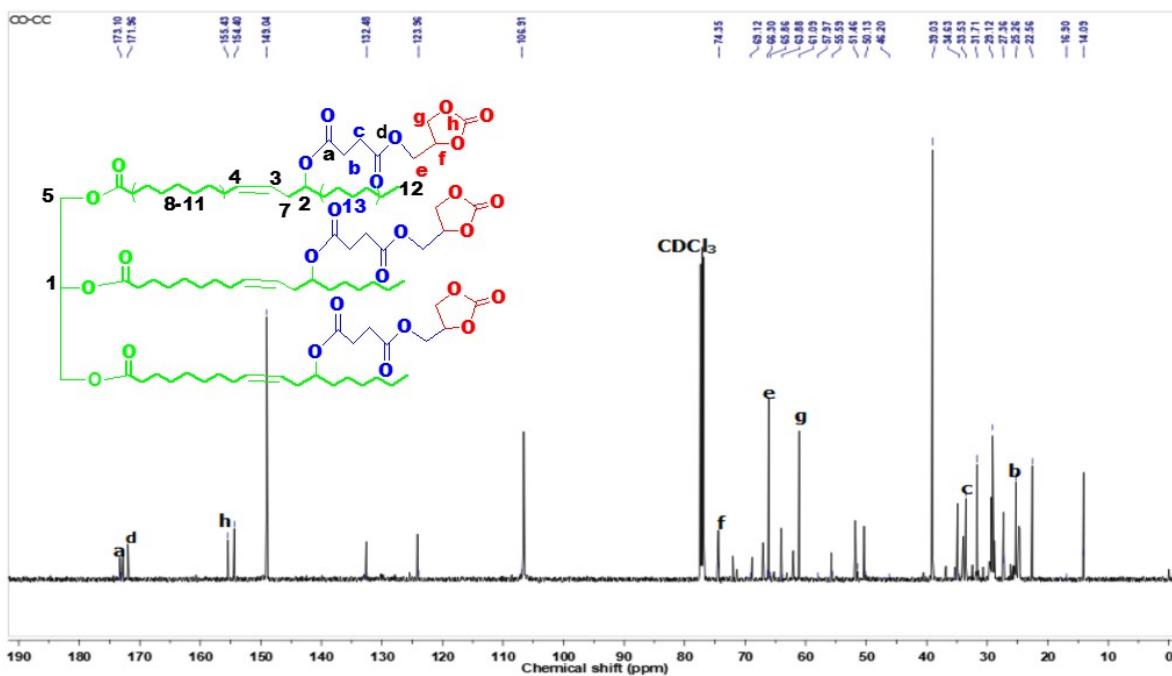

241  
242

Fig. S5  $^{13}\text{C}$  NMR spectrum of castor oil cyclic carbonate (CO-CC).

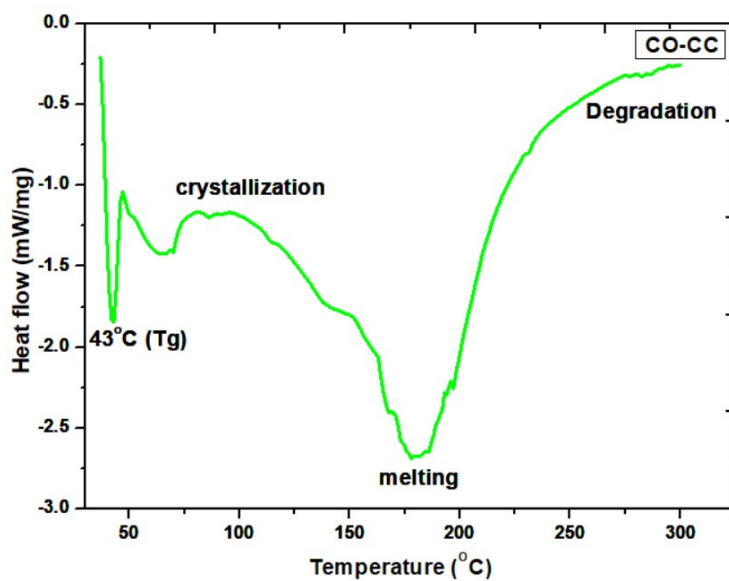

243  
244

Fig. S6 DSC profile of castor oil cyclic carbonate (CO-CC).

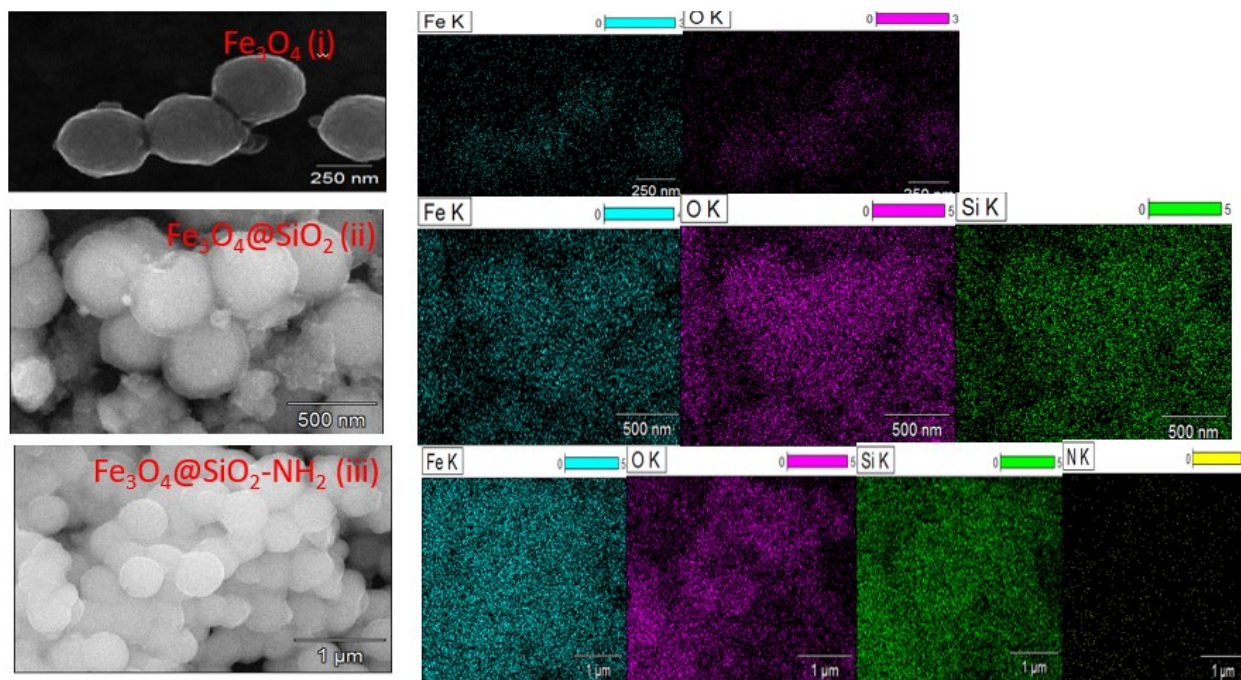

245  
246  
247

**Fig. S7** Elemental mapping images of synthesized i)  $\text{Fe}_3\text{O}_4$  ii)  $\text{Fe}_3\text{O}_4@\text{SiO}_2$  and iii)  $\text{Fe}_3\text{O}_4@\text{SiO}_2\text{-NH}_2$ .

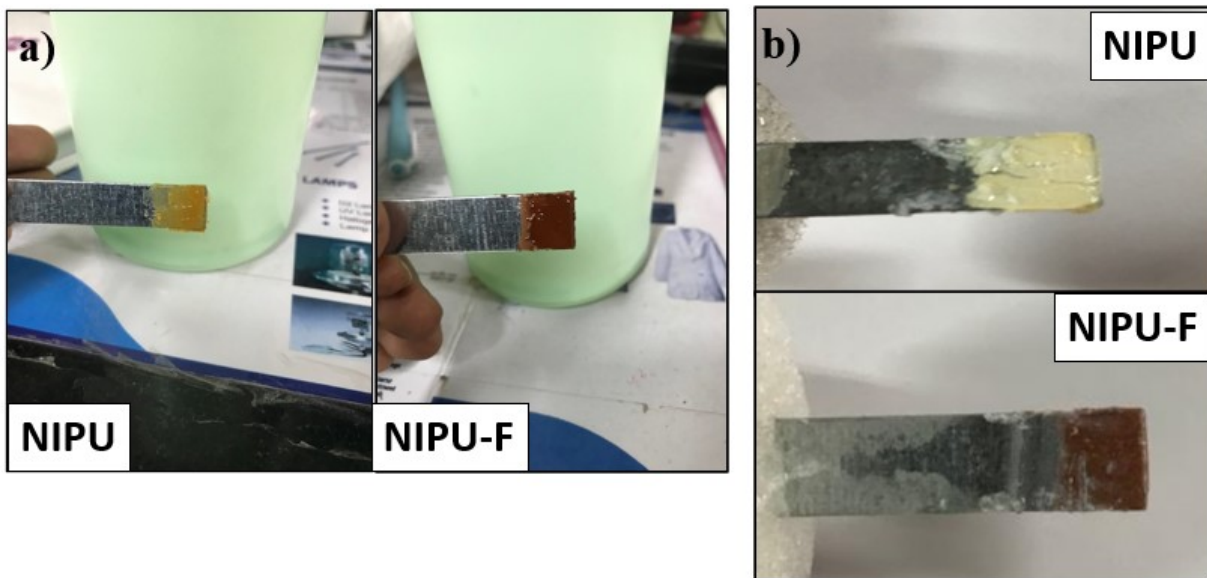

248  
249  
250  
251

**Fig. S8** Physical images of coatings on mild carbon steel a) before and b) after immersion in electrolyte solution.

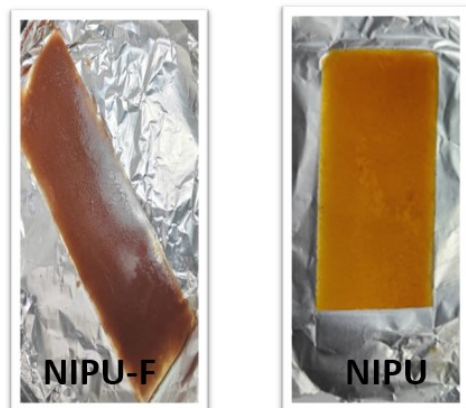

252  
253

**Fig. S9** Photograph images of NIPU and NIPU-F films.

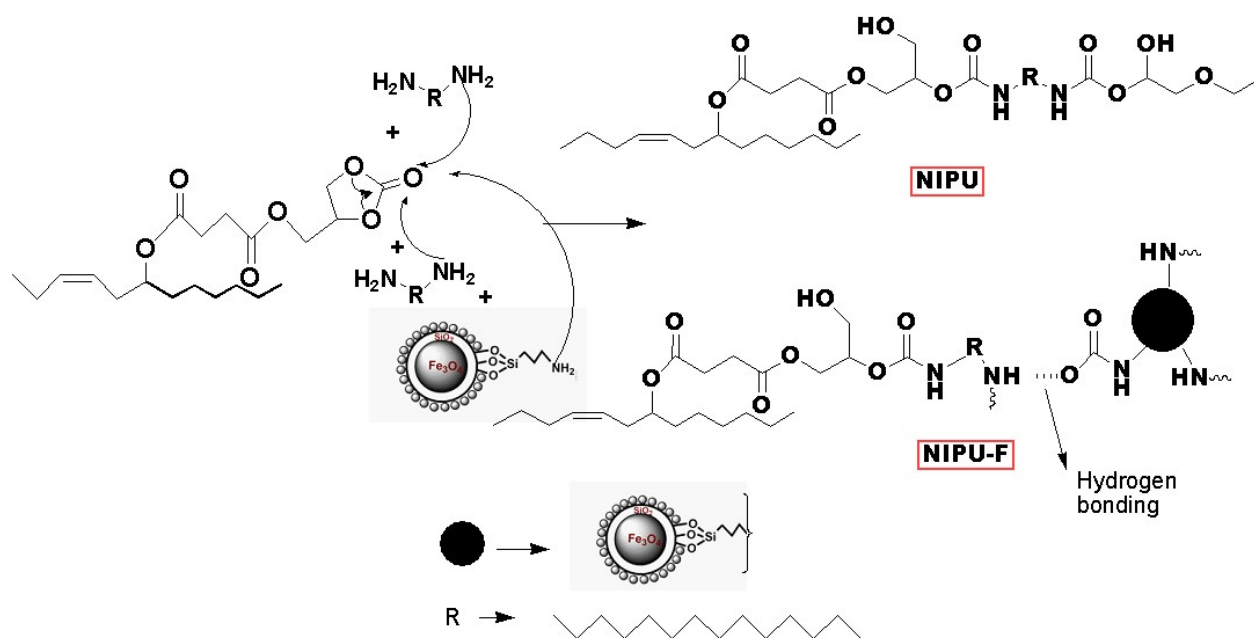

254  
255  
256  
257

**Fig. S10** Chemical mechanism for the formulation of NIPU and NIPU-F (only one amine functional group is shown in amine functionalised  $\text{Fe}_3\text{O}_4$  nanoparticles for clarity).

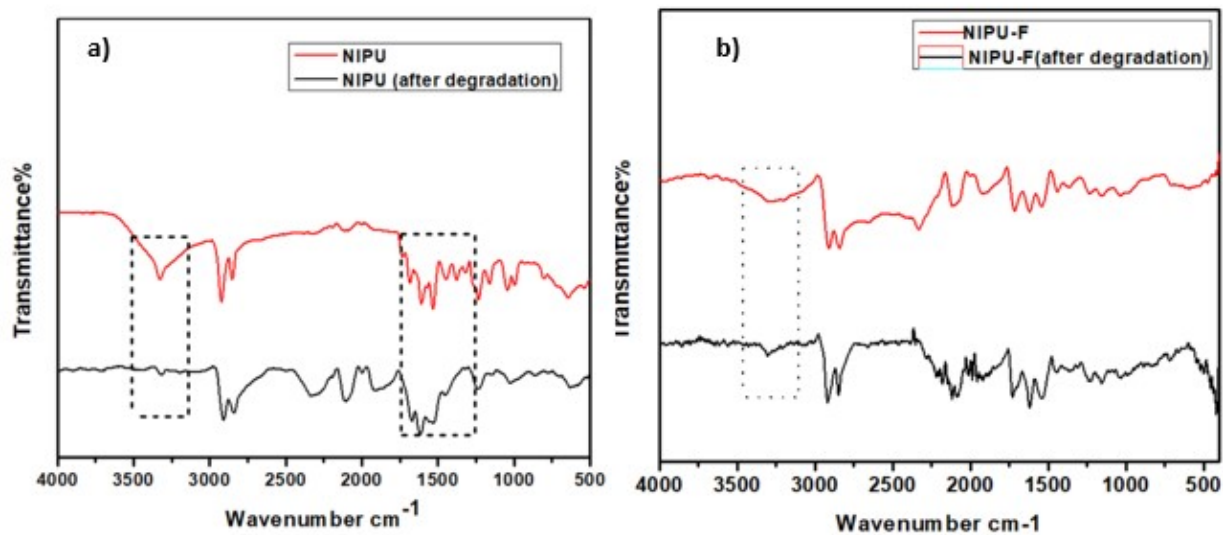

258

259 **Fig.S11** FT IR data of biodegradation studies in PBS saline medium a) NIPU and b) NIPU-F.

260

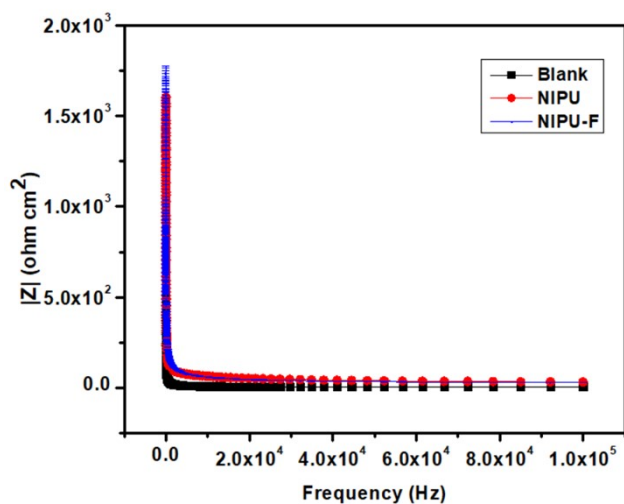

261

262 **Fig.S12** Bode diagrams for blank, NIPU and NIPU-F after immersed in electrolyte for 24h.

263



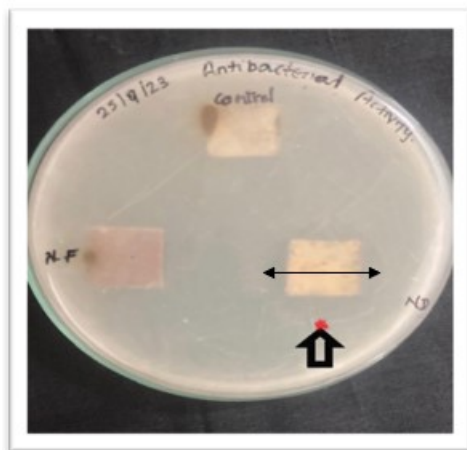

264

265 **Fig.S13** Zone of inhibition test for qualitative analysis of antibacterial efficacy in NIPU, NIPU-F  
 266 and blank substrate.

267 **Table.S1** Equivalent circuit-based impedance data for coatings immersed in 3.5 wt.% of  
 268 NaCl for 1h and 24 h

| Coatings | Immersion time(1h)                 |                                               | Immersion time (24h)               |                                            |                                       |                                          |                                             |
|----------|------------------------------------|-----------------------------------------------|------------------------------------|--------------------------------------------|---------------------------------------|------------------------------------------|---------------------------------------------|
|          | $R_s$<br>( $\Omega \text{ cm}^2$ ) | $R_{ct}$<br>( $\text{K}\Omega \text{ cm}^2$ ) | $R_s$<br>( $\Omega \text{ cm}^2$ ) | $R_c$<br>( $\text{K}\Omega \text{ cm}^2$ ) | $R_{ct}$<br>( $\Omega \text{ cm}^2$ ) | $\text{CPE}_c$<br>( $\text{F cm}^{-2}$ ) | $\text{CPE}_{dl}$<br>( $\text{F cm}^{-2}$ ) |
| Blank    | 4.20                               | 0.187                                         | 4.51                               | 0.135                                      | 0.308                                 | $6.05 \cdot 10^{-3}$                     | $0.19 \cdot 10^{-3}$                        |
| NIPU     | 4.61                               | 1.113                                         | 14.64                              | 0.104                                      | 0.716                                 | $26.6 \cdot 10^{-3}$                     | $62.5 \cdot 10^{-6}$                        |
| NIPU-F   | 4.99                               | 2.544                                         | 16.82                              | 0.936                                      | 1.115                                 | $25.3 \cdot 10^{-6}$                     | $54.3 \cdot 10^{-6}$                        |

269

270

271

272

273

274

275

276

277 **Table.S2 Statistical analysis data for the sample NIPU and NIPU-F undergoes degradation**  
 278 **for 45 days in PBS saline medium**

|                                |       |       |       |       |       |       |       |       |       |      |
|--------------------------------|-------|-------|-------|-------|-------|-------|-------|-------|-------|------|
| <b>degradation time (days)</b> | 0     | 5     | 10    | 15    | 20    | 25    | 30    | 35    | 40    | 45   |
| <b>Mean (NIPU)</b>             | 100.1 | 77.3  | 74.3  | 73.3  | 70.3  | 68.1  | 68.1  | 68.1  | 68.1  | 68.1 |
| <b>SD (NIPU)</b>               | 0.1   | 0.264 | 0.264 | 0.264 | 0.057 | 0.152 | 0.23  | 0.057 | 0.173 | 0.2  |
| <b>Mean (NIPU-F)</b>           | 100.1 | 81.2  | 80.2  | 80.3  | 80.1  | 78.2  | 76.2  | 76.2  | 76.2  | 76.2 |
| <b>SD (NIPU-F)</b>             | 0.1   | 0.208 | 0.2   | 0.321 | 0.23  | 0.2   | 0.113 | 0.2   | 0.173 | 0.2  |

279 SD-standard deviation;

280 **Table.S3 Statistical analysis data for antibacterial and anti-algae studies**

| <b>Test type</b> | <b>antibacterial (E.Coli)</b> |           | <b>anti-algae (S.Platensis)</b> |           |
|------------------|-------------------------------|-----------|---------------------------------|-----------|
|                  | <b>Mean</b>                   | <b>SD</b> | <b>Mean</b>                     | <b>SD</b> |
| <b>Blank</b>     | 45000                         | 89.938    | 8.5                             | 0.08736   |
| <b>NIPU-F</b>    | 5080                          | 13.719    | 4.143                           | 0.00832   |
| <b>NIPU</b>      | 120                           | 6.649     | 2.526                           | 0.00152   |

281

282

283

284

285

286

287

288 **References**

- 289 1. D.K.Chelike and S.A.G Thangavelu, *RSC Adv.*, 2023, **13**, 309-319.
- 290 2. M. Kathalewar, A. Sabnis and G. Waghoo, *Prog. Org. Coat.*, 2013, **76**, 1215-1229.
- 291 3. S. Tian, D. Jiang, J. Pu, X. Sun, Z. Li, B. Wu, W. Zheng, W. Liu and Z. Liu, *Chem. Eng.*
- 292 *J.*, 2019, **370**, 1-9.
- 293 4. L. Zeng, Z. Liu, J. Huang, X. Wang, H. Guo and W.H. Li, *Gels*, 2022, **8**, 407.
- 294 5. M. Helou, J.F. Carpentier, and S.M. Guillaume, *Green Chem.*, 2011, **13**, 266-271.
- 295 6. A. Shaik, N. Ramanuj, and K.V.S.N. Raju, *ACS Sustainable Chem. Eng.*, 2013, **8**, 910–
- 296 918.
- 297 7. C. Mokhtari, F. Malek, A. Manseri, S. Caillol and C. Negrell, *Eur. Polym. J.*, 2019, **113**,
- 298 18-28.
- 299 8. L. Zhang, X. Luo, Y. Qin and Y. Li, *RSC adv.*, 2017, **7**, 37-46.
- 300 9. A.A.B. Christus, P. Panneerselvam, and A. Ravikumar, *Analytical Methods*, 2018, **10**,
- 301 4378-4386.
- 302 10. J. Zhao, Y. Niu, B. Ren, H. Chen, S. Zhang, J. Jin and Y. Zhang, *Chem. Eng. J.*,
- 303 2018, **347**, 574-584.
- 304 11. Y. Zhang, T. Ge, Y. Li, J. Lu, H. Du, Yan, L., H. Tan, J. Li and Y. Yin, *Polymers*, 2023,
- 305 **15**, 317
